# Supplementary material for: Adequate Animal Protein Intake Maintains Normal Thyroid Antibody Levels in Pregnant Women With Mild Iodine Deficiency
Source: Research Square preprint supplement (doi:10.21203/rs.3.rs-141454/v1), 2021-01-13
Supplement: Supplementary file 1 [file b8b213d22e76647e508eab70.docx]

Table 2. Characteristics and thyroid disease stratified by animal protein intake

|  | Pooled | | | | Early pregnancy | | | | | | Middle pregnancy | | | | Late pregnancy | | | | |
| --- | --- | --- | --- | --- | --- | --- | --- | --- | --- | --- | --- | --- | --- | --- | --- | --- | --- | --- | --- |
| Top third | Middle third | Bottom third | *P* | | Top third | Middle third | Bottom third | *P* | Top third | | Middle third | Bottom third | *P* | | Top third | Middle third | Bottom third | *P* |
| *N* | 1549 | 1548 | 1549 |  | | 641 | 579 | 466 |  | 529 | | 502 | 540 |  | | 379 | 467 | 543 |  |
| **UIC**, ug/L (median p25, p75) | 138.0 (79.0,222.0) | 136.0 (80.7,216.0) | 142.0 (84.7,222.0) | 0.436 | | 146.0 (85.9,241.0) | 150.0 (86.6,234.0) | 146.0 (91.1,239.0) | 0.860 | 144.0 (86.6,220.0) | | 134.0 (83.7,208.0) | 142.0 (88.1,221.0) | 0.380 | | 124.0 (69.4,198.0) | 119.0 (64.9,196.0) | 120.0 (69.3,301.0) | 0.886 |
| **Age ≥ 35** y,% | 13.65 | 15.14 | 13.51 | 0.353 | | 13.88 | 19.40 | 12.32 | 0.002 | 13.77 | | 13.22 | 14.01 | 0.930 | | 13.23 | 13.42 | 13.07 | 0.988 |
| **Educational level** |  |  |  | 0.002 | |  |  |  | <0.001 |  | |  |  | <0.001 | |  |  |  | 0.291 |
| ≤ 9 y, % | 13.70 | 13.78 | 18.70 |  | | 11.16 | 8.82 | 16.19 |  | 13.33 | | 17.17 | 22.2 |  | | 16.24 | 16.27 | 18.04 |  |
| Senior high school and college, % | 40.18 | 38.94 | 42.86 |  | | 37.98 | 37.37 | 42.14 |  | 44.26 | | 39.12 | 43.26 |  | | 38.01 | 40.69 | 43.50 |  |
| Bachelor degree and above, % | 46.12 | 47.28 | 38.44 |  | | 50.86 | 53.81 | 41.67 |  | 42.42 | | 43.71 | 34.54 |  | | 45.76 | 43.04 | 38.46 |  |
| **Occupational status** |  |  |  | 0.109 | |  |  |  | 0.257 |  | |  |  | 0.124 | |  |  |  | 0.951 |
| Mental, % | 55.84 | 58.14 | 54.52 |  | | 56.01 | 60.28 | 56.16 |  | 57.59 | | 59.16 | 53.12 |  | | 53.96 | 54.39 | 53.30 |  |
| Physical, % | 44.16 | 41.86 | 45.58 |  | | 43.99 | 39.72 | 43.84 |  | 42.41 | | 40.84 | 46.88 |  | | 46.04 | 45.61 | 46.70 |  |
| **Family income last year**, UAN | |  |  | 0.002 | |  |  |  | 0.004 |  | |  |  | 0.100 | |  |  |  | 0.513 |
| < 100,000, % | 17.03 | 15.07 | 19.84 |  | | 13.76 | 10.55 | 18.43 |  | 17.69 | | 16.97 | 20.53 |  | | 19.19 | 18.63 | 21.28 |  |
| 100,000-200,000, % | 40.16 | 41.66 | 42.09 |  | | 41.51 | 42.56 | 39.84 |  | 39.48 | | 41.92 | 44.30 |  | | 39.67 | 40.26 | 42.82 |  |
| ≥ 200,000, % | 42.81 | 43.27 | 38.06 |  | | 44.73 | 46.89 | 41.73 |  | 42.83 | | 41.12 | 35.17 |  | | 41.14 | 41.11 | 35.90 |  |
| **Former drinker**, % | 10.49 | 10.32 | 10.35 | 0.987 | | 8.01 | 10.57 | 10.11 | 0.298 | 14.34 | | 11.13 | 9.98 | 0.078 | | 8.91 | 9.74 | 10.68 | 0.667 |
| **First pregnancy**, % | 61.85 | 60.79 | 60.56 | 0.735 | | 64.41 | 62.63 | 62.10 | 0.702 | 62.02 | | 60.80 | 57.44 | 0.293 | | 60.69 | 57.24 | 61.34 | 0.392 |
| **Hypothyroidism**, % | 0.98 | 0.59 | 0.66 | 0.404 | | 0.00 | 0.36 | 0.00 | 0.138 | 0.77 | | 0.78 | 0.58 | 0.915 | | 1.74 | 1.31 | 1.57 | 0.864 |
| **TPO-Ab (+),** % | 11.49 | 10.65 | 9.07 | 0.085 | | 12.32 | 11.05 | 9.86 | 0.426 | 12.86 | | 10.14 | 7.96 | 0.034 | | 9.80 | 9.80 | 9.42 | 0.975 |
| **TG-Ab(+)**, % | 9.27 | 9.08 | 9.93 | 0.702 | | 11.59 | 11.59 | 12.54 | 0.851 | 8.64 | | 9.16 | 7.77 | 0.721 | | 7.84 | 6.97 | 7.40 | 0.881 |
| **TR-Ab(+)**, % | 6.27 | 7.25 | 11.90 | <0.001 | | 10.33 | 11.94 | 11.83 | 0.639 | 4.80 | | 4.09 | 9.51 | <0.001 | | 5.45 | 5.01 | 12.33 | <0.001 |
| **TPO-Ab / TG-Ab / TR-Ab (+)**, % | 20.89 | 20.18 | 23.60 | 0.053 | | 25.54 | 23.71 | 24.37 | 0.772 | 19.58 | | 17.54 | 20.78 | 0.414 | | 19.39 | 17.65 | 24.44 | 0.032 |
